# Supplementary material
Source: publisher figshare collection journal article supplement (https://sage.figshare.com/ndownloader/files/14507387)
Supplement: Supplementary file 1 [file 14507387]

## Appendix 1: Search strings

---

Search strings were developed in consultation with a research librarian and used use a combination of MeSH terms and free text terms to describe characteristics of our target population (e.g., [adolescent, young adult, juvenile, teenager] AND [severe mental disorder, complex mental illness, psychotic disorders, dual disability]) AND [intervention/clinical model (e.g., adolescent health services, continuity of patient care, long term care)]. The search strategy was developed and refined in PubMed using MeSH terms, and then adapted to suit the search style on all other databases used.

Specific search strings used are detailed below.

(((((("Child"[Mesh:NoExp]) OR "Adolescent"[Mesh]) OR "Young Adult"[Mesh])) OR youth[Title/Abstract]) OR adolescent[Title/Abstract]) OR teenager[Title/Abstract]) OR juvenile[Title/Abstract]

AND

(((((((((((((((((((((((((((((( "Affective Disorders, Psychotic/psychology"[Mesh] OR "Affective Disorders, Psychotic/rehabilitation"[Mesh] OR "Affective Disorders, Psychotic/therapy"[Mesh] )) OR ( "Psychotic Disorders/psychology"[Mesh:NoExp] OR "Psychotic Disorders/rehabilitation"[Mesh:NoExp] OR "Psychotic Disorders/therapy"[Mesh:NoExp] )) OR ( "Schizophrenia/psychology"[Mesh] OR "Schizophrenia/rehabilitation"[Mesh] OR "Schizophrenia/therapy"[Mesh] )) OR ( "Depressive Disorder, Major/psychology"[Mesh] OR "Depressive Disorder, Major/rehabilitation"[Mesh] OR "Depressive Disorder, Major/therapy"[Mesh] )) OR ( "Depressive Disorder, Treatment-Resistant/psychology"[Mesh] OR "Depressive Disorder, Treatment-Resistant/rehabilitation"[Mesh] OR "Depressive Disorder, Treatment-Resistant/therapy"[Mesh] )) OR ( "Anxiety, Separation/psychology"[Mesh] OR "Anxiety, Separation/rehabilitation"[Mesh] OR "Anxiety, Separation/therapy"[Mesh] )) OR ( "Obsessive-Compulsive Disorder/psychology"[Mesh:NoExp] OR "Obsessive-Compulsive Disorder/rehabilitation"[Mesh:NoExp] OR "Obsessive-Compulsive Disorder/therapy"[Mesh:NoExp] )) OR ( "Anorexia Nervosa/psychology"[Mesh] OR "Anorexia Nervosa/rehabilitation"[Mesh] OR "Anorexia Nervosa/therapy"[Mesh] )) OR ( "Personality Disorders/psychology"[Mesh:NoExp] OR "Personality Disorders/rehabilitation"[Mesh:NoExp] OR "Personality Disorders/therapy"[Mesh:NoExp] )) OR ( "Borderline Personality Disorder/psychology"[Mesh] OR "Borderline Personality Disorder/rehabilitation"[Mesh] OR "Borderline Personality Disorder/therapy"[Mesh] )) OR ( "Schizoid Personality Disorder/psychology"[Mesh] OR "Schizoid Personality Disorder/rehabilitation"[Mesh] OR "Schizoid Personality Disorder/therapy"[Mesh] )) OR ( "Schizotypal Personality Disorder/psychology"[Mesh] OR "Schizotypal Personality Disorder/rehabilitation"[Mesh] OR "Schizotypal Personality Disorder/therapy"[Mesh] )) OR ( "Schizophrenia, Childhood/psychology"[Mesh] OR "Schizophrenia, Childhood/rehabilitation"[Mesh] OR "Schizophrenia, Childhood/therapy"[Mesh] )) OR ( "Bipolar Disorder/psychology"[Mesh] OR "Bipolar Disorder/rehabilitation"[Mesh] OR "Bipolar Disorder/therapy"[Mesh] )) OR ( "Stress Disorders, Post-Traumatic/psychology"[Mesh] OR "Stress Disorders, Post-Traumatic/rehabilitation"[Mesh] OR "Stress Disorders, Post-Traumatic/therapy"[Mesh] ))) OR "severe mental disorder") OR "severe mental disorders") OR "severe depression") OR "severe depressive") OR "severe anxiety") OR "serious mental health") OR "serious mental illness") OR "complex mental health") OR "complex mental illness") OR "dual disability") OR ("multimorbidity"[tiab] AND ("mental"[ti] OR "psychiatric"[tiab]))) OR (("multi-morbidity"[tiab] AND ("mental"[tiab] OR "psychiatric"[tiab]))) OR "severe mental illness") OR "complex needs") OR "complex trauma") OR "severe trauma") OR "dysphoria") OR "reactive attachment"

AND

((((model[ti] AND care[ti]) OR (models[ti] AND care[ti]) OR "healthcare delivery" OR "health care delivery" OR "clinical framework" OR "contemporary framework" OR "service delivery" OR "system of care" OR "care

pathway" OR "service structure" OR "Chronic Care Management" OR "Extended care" OR "Extended treatment" OR "Integrated care" OR "Integrated model" OR "Mental health services" OR "child and adolescent mental health services" OR "outpatient program" OR "inpatient program" OR "day program" OR "Integrated systemic therapy" OR (model[ti] AND transition[ti]) OR "transitional care" OR "Adolescent Health Services/legislation and jurisprudence"[Mesh] OR "Adolescent Health Services/organization and administration"[Mesh] OR "Mental Health Services/legislation and jurisprudence"[Mesh:NoExp] OR "Mental Health Services/methods"[Mesh:NoExp] OR "Mental Health Services/organization and administration"[Mesh:NoExp] OR "Community Mental Health Services/legislation and jurisprudence"[Mesh] OR "Community Mental Health Services/methods"[Mesh] OR "Community Mental Health Services/organization and administration"[Mesh] OR "Community Mental Health Services/standards"[Mesh] OR "Continuity of Patient Care/legislation and jurisprudence"[Mesh:NoExp] OR "Continuity of Patient Care/organization and administration"[Mesh:NoExp] OR "Continuity of Patient Care/standards"[Mesh:NoExp] OR "Transition to Adult Care/legislation and jurisprudence"[Mesh] OR "Transition to Adult Care/organization and administration"[Mesh] OR "Transition to Adult Care/standards"[Mesh] OR "Long-Term Care/legislation and jurisprudence"[Mesh] OR "Long-Term Care/methods"[Mesh] OR "Long-Term Care/organization and administration"[Mesh] OR "Long-Term Care/standards"[Mesh] OR "Patient Care Planning/legislation and jurisprudence"[Mesh:NoExp] OR "Patient Care Planning/methods"[Mesh:NoExp] OR "Patient Care Planning/organization and administration"[Mesh:NoExp] OR "Patient Care Planning/standards"[Mesh:NoExp] OR "Delivery of Health Care/legislation and jurisprudence"[Mesh:NoExp] OR "Delivery of Health Care/methods"[Mesh:NoExp] OR "Delivery of Health Care/organization and administration"[Mesh:NoExp] OR "Delivery of Health Care/standards"[Mesh:NoExp] OR "Delivery of Health Care, Integrated/legislation and jurisprudence"[Mesh:NoExp] OR "Delivery of Health Care, Integrated/methods"[Mesh:NoExp] OR "Delivery of Health Care, Integrated/organization and administration"[Mesh:NoExp] OR "Delivery of Health Care, Integrated/standards"[Mesh:NoExp] OR "Health Care Reform/legislation and jurisprudence"[Mesh] OR "Health Care Reform/methods"[Mesh] OR "Health Care Reform/organization and administration"[Mesh] OR "Health Care Reform/standards"[Mesh] OR "Managed Care Programs/legislation and jurisprudence"[Mesh:NoExp] OR "Managed Care Programs/methods"[Mesh:NoExp] OR "Managed Care Programs/organization and administration"[Mesh:NoExp] OR "Managed Care Programs/standards"[Mesh:NoExp] OR "Health Services Research/legislation and jurisprudence"[Mesh:NoExp] OR "Health Services Research/methods"[Mesh:NoExp] OR "Health Services Research/organization and administration"[Mesh:NoExp] OR "Health Services Research/standards"[Mesh:NoExp] OR "Comparative Effectiveness Research/legislation and jurisprudence"[Mesh] OR "Comparative Effectiveness Research/methods"[Mesh] OR "Comparative Effectiveness Research/organization and administration"[Mesh] OR "Comparative Effectiveness Research/standards"[Mesh] OR "Psychiatric Rehabilitation/legislation and jurisprudence"[Mesh] OR "Psychiatric Rehabilitation/methods"[Mesh] OR "Psychiatric Rehabilitation/organization and administration"[Mesh] OR "Psychiatric Rehabilitation/standards"[Mesh] OR "Adolescent Psychiatry/legislation and jurisprudence"[Mesh] OR "Adolescent Psychiatry/methods"[Mesh] OR "Adolescent Psychiatry/organization and administration"[Mesh] OR "Adolescent Psychiatry/standards"[Mesh] OR "Patient-Centered Care/legislation and jurisprudence"[Mesh] OR "Patient-Centered Care/methods"[Mesh] OR "Patient-Centered Care/organization and administration"[Mesh] OR "Patient-Centered Care/standards"[Mesh] OR "Program Evaluation/methods"[Mesh:NoExp] OR "Program Evaluation/standards"[Mesh:NoExp] OR "Program Development/methods"[Mesh] OR "Program Development/organization and administration"[Mesh] OR "Program Development/standards"[Mesh] OR "Ambulatory Care Facilities/legislation and jurisprudence"[Mesh:NoExp] OR "Ambulatory Care Facilities/methods"[Mesh:NoExp] OR "Ambulatory Care Facilities/organization and administration"[Mesh:NoExp] OR "Ambulatory Care Facilities/standards"[Mesh:NoExp] OR "Models, Organizational"[Mesh]))
